# Supplementary material
Source: publisher figshare collection journal article supplement (https://plos.figshare.com/articles/dataset/_/1473846)
Supplement: Supplementary file [file 1]

**Table S2: Melting temperatures ( $T_m$ ) of amplimers, as e.g. depicted in Figure 3 using different amounts of DNA.** Left:  $T_m$  of amplification of 1 ng of genomic template DNA; Right:  $T_m$  of amplification of the minimal needed DNA amount for successful peak detection (*cf.* Table 1 for template amount), the standard deviation (SD) is given for one representative per group; as these were analyzed in triplicates.

| Species     | Melting temperature in °C of |             |                                                                   |                  |
|-------------|------------------------------|-------------|-------------------------------------------------------------------|------------------|
|             | 1 ng template DNA            |             | 20 pg - 200 pg template DNA (species dependent sensitivity level) |                  |
|             | <i>12S rRNA</i>              | <i>cytb</i> | <i>12S rRNA</i> ± SD                                              | <i>cytb</i> ± SD |
| Human       | 80.3                         | 84.4        | 80.7 ± 0.1                                                        | 84.3 ± 0.3       |
| Horse       | 80.3                         | 83.9        | 80.4 ± 0.4                                                        | 83.7 ± 0.3       |
| Donkey      | 79.7                         | 84.0        | 79.9                                                              | 84.1             |
| Chicken     | 82.4                         | 85.3        | 82.5 ± 0.3                                                        | 85.7 ± 0.3       |
| Turkey      | 81.1                         | 85.0        | 81.0                                                              | 85.0             |
| Dog         | 78.8                         | 83.5        | 79.1 ± 0.3                                                        | 83.5 ± 0.0       |
| Fox         | 78.4                         | 82.6        | 78.8                                                              | 82.9             |
| Hare        | 78.8                         | 82.4        | 79.1                                                              | 82.8             |
| Rabbit      | 78.2                         | 81.9        | 78.7 ± 0.1                                                        | 81.9 ± 0.1       |
| Cow         | 78.8                         | 82.8        | 78.7 ± 0.1                                                        | 82.9 ± 0.4       |
| Pig         | 78.3                         | 83.9        | 78.8 ± 0.1                                                        | 84.2 ± 0.1       |
| Cat         | 79.6                         | 84.0        | 80.0 ± 0.2                                                        | 84.2 ± 0.1       |
| Lynx        | 79.3                         | 85.5        | 79.7                                                              | 84.4             |
| Pine marten | 78.5                         | 85.3        | 79.1 ± 0.3                                                        | 85.5 ± 0.2       |
| Weasel      | 78.0                         | 83.9        | 78.8                                                              | 84.4             |
| Red deer    | 80.0                         | 82.8        | 80.0 ± 0.5                                                        | 83.5 ± 0.4       |
| Roe deer    | 79.1                         | 82.8        | 80.1                                                              | 83.5             |
| Nude mouse  | 77.3                         | 83.8        | 77.7 ± 0.1                                                        | 84.2 ± 0.2       |
| Squirrel    | 79.0                         | 82.8        | 79.7                                                              | 83.4             |
| Sheep       | 77.6                         | 83.0        | 78.5                                                              | 83.7             |
| Goat        | 79.0                         | 84.3        | 79.6 ± 0.4                                                        | 84.4 ± 0.2       |
