# Supplementary material
Source: publisher figshare collection journal article supplement (https://plos.figshare.com/articles/dataset/_/1473846)
Supplement: Supplementary file [file 1]

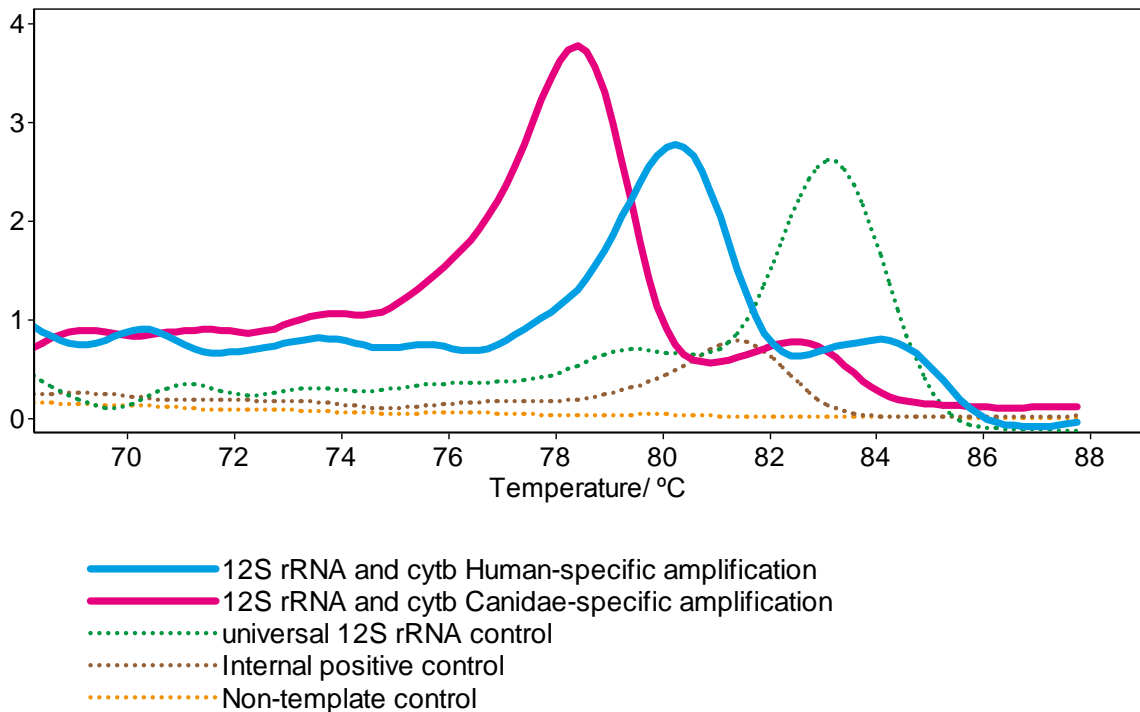

**Figure S4: Melt curve analysis after PCR with a *GeneSlice* of DNA recovered from an animal's bite mark on a tent.** The analysis reveals the occurrence of human DNA and DNA from a species of the family of Canidae. Characterization of the melt peaks identified the DNA origin as fox, which matches an earlier conducted and published examination of the sample with additional species-specific PCR [1]. Controls included in the *GeneSlice* showed valid signals.

1. Naue J, Lutz-Bonengel S, Pietsch K, Sanger T, Schlauderer N, Schmidt U. Bite through the tent. Int J Legal Med. 2012 May 1;126(3):483–488.
