# Supplementary material
Source: publisher figshare collection journal article supplement (https://plos.figshare.com/articles/dataset/_/1473846)
Supplement: Supplementary file [file 1]

## Failure alert mechanism

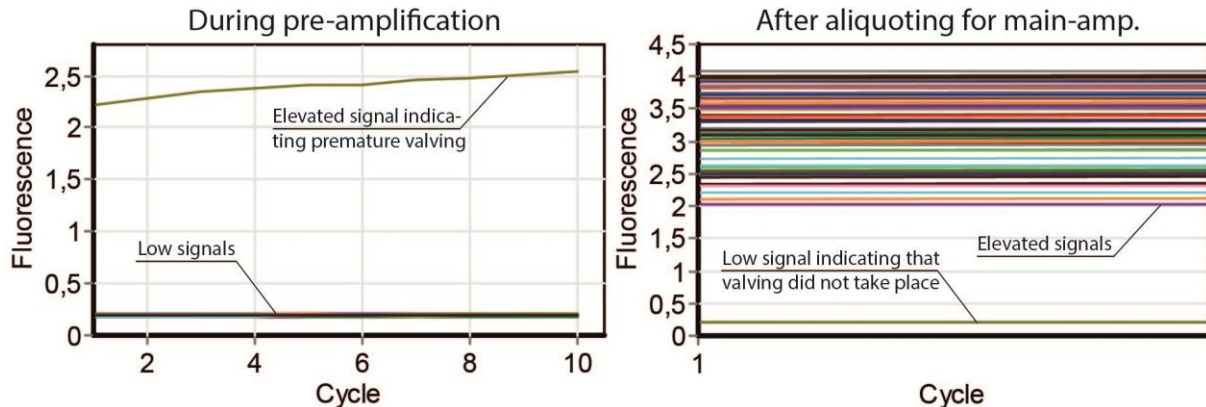

**Figure S2: Failure alert mechanism:** Fluorescence signal increase during pre-amplification indicates that the corresponding main-amplification cavity was filled by premature siphon valving (left). If signals do not increase during aliquoting, it indicates that capillary siphon valving did not take place for the corresponding structure (right).
