# Supplementary material
Source: publisher figshare collection journal article supplement (https://plos.figshare.com/articles/dataset/_/1473846)
Supplement: Supplementary file [file 1]

**Table S1: Primer sequences and amount used for pre-storage in the GeneSlice.** Universal *12S rRNA* and *cytb* for pre-amplification were pre-stored within the Sample and NTC pre-amplification chambers. The *12S rRNA* and *cytb* animal-group-specific primers of the twelve groups, as well as the universal *12S rRNA* primer pair and internal positive control (IPC) consisting of a primer pair and an 81 bp oligonucleotide were pre-stored in the 14 main-amplification cavities of the sample. The universal *12S rRNA* primer pair was additionally used for the main-amplification cavity of the NTC.

| Cavity         | Function                        | Gene      | PCR product (bp) | Primer direction                                                                                                                                                                                                                                                                                                                                                                                                                                                                                                                                                                                                                                                                                                                                                                                                                                                                                                                                                                                                                                                                                                                                                                                                                                                                                                                                                                                                                                                                                                                                                                                                                                                                                                                                                                                                                                                                                                                                                                                                                                                                                                                                                                                                                                                                                                                                                                                                                                                                                                                                                                                                                                                                                                                                                                                                                                                                                                                                                                                                                                                                                                                                                                                                                                                                                                                                                                                                                                                                                                                                                                                                                                                                                                                                                                                                                                                                                                                                                                                                                                                                                                                                                                                                                                                                                                                                                                                                                                                                                                                                                                                                                                                                                                                                                                                                                                                                                                                                                                                                                                                                                                                                                                                                                                                                                           | Primer sequence                                           | Preloaded primer (pmol) |  |  |  |
|----------------|---------------------------------|-----------|------------------|------------------------------------------------------------------------------------------------------------------------------------------------------------------------------------------------------------------------------------------------------------------------------------------------------------------------------------------------------------------------------------------------------------------------------------------------------------------------------------------------------------------------------------------------------------------------------------------------------------------------------------------------------------------------------------------------------------------------------------------------------------------------------------------------------------------------------------------------------------------------------------------------------------------------------------------------------------------------------------------------------------------------------------------------------------------------------------------------------------------------------------------------------------------------------------------------------------------------------------------------------------------------------------------------------------------------------------------------------------------------------------------------------------------------------------------------------------------------------------------------------------------------------------------------------------------------------------------------------------------------------------------------------------------------------------------------------------------------------------------------------------------------------------------------------------------------------------------------------------------------------------------------------------------------------------------------------------------------------------------------------------------------------------------------------------------------------------------------------------------------------------------------------------------------------------------------------------------------------------------------------------------------------------------------------------------------------------------------------------------------------------------------------------------------------------------------------------------------------------------------------------------------------------------------------------------------------------------------------------------------------------------------------------------------------------------------------------------------------------------------------------------------------------------------------------------------------------------------------------------------------------------------------------------------------------------------------------------------------------------------------------------------------------------------------------------------------------------------------------------------------------------------------------------------------------------------------------------------------------------------------------------------------------------------------------------------------------------------------------------------------------------------------------------------------------------------------------------------------------------------------------------------------------------------------------------------------------------------------------------------------------------------------------------------------------------------------------------------------------------------------------------------------------------------------------------------------------------------------------------------------------------------------------------------------------------------------------------------------------------------------------------------------------------------------------------------------------------------------------------------------------------------------------------------------------------------------------------------------------------------------------------------------------------------------------------------------------------------------------------------------------------------------------------------------------------------------------------------------------------------------------------------------------------------------------------------------------------------------------------------------------------------------------------------------------------------------------------------------------------------------------------------------------------------------------------------------------------------------------------------------------------------------------------------------------------------------------------------------------------------------------------------------------------------------------------------------------------------------------------------------------------------------------------------------------------------------------------------------------------------------------------------------------------------------------|-----------------------------------------------------------|-------------------------|--|--|--|
| Sample/<br>NTC | Pre-amplification               | 12S rRNA  | ~200             | for                                                                                                                                                                                                                                                                                                                                                                                                                                                                                                                                                                                                                                                                                                                                                                                                                                                                                                                                                                                                                                                                                                                                                                                                                                                                                                                                                                                                                                                                                                                                                                                                                                                                                                                                                                                                                                                                                                                                                                                                                                                                                                                                                                                                                                                                                                                                                                                                                                                                                                                                                                                                                                                                                                                                                                                                                                                                                                                                                                                                                                                                                                                                                                                                                                                                                                                                                                                                                                                                                                                                                                                                                                                                                                                                                                                                                                                                                                                                                                                                                                                                                                                                                                                                                                                                                                                                                                                                                                                                                                                                                                                                                                                                                                                                                                                                                                                                                                                                                                                                                                                                                                                                                                                                                                                                                                        | GCCACCGGGGTC *1a                                          | 10 (NTC: 2.5)           |  |  |  |
|                |                                 |           |                  | rev                                                                                                                                                                                                                                                                                                                                                                                                                                                                                                                                                                                                                                                                                                                                                                                                                                                                                                                                                                                                                                                                                                                                                                                                                                                                                                                                                                                                                                                                                                                                                                                                                                                                                                                                                                                                                                                                                                                                                                                                                                                                                                                                                                                                                                                                                                                                                                                                                                                                                                                                                                                                                                                                                                                                                                                                                                                                                                                                                                                                                                                                                                                                                                                                                                                                                                                                                                                                                                                                                                                                                                                                                                                                                                                                                                                                                                                                                                                                                                                                                                                                                                                                                                                                                                                                                                                                                                                                                                                                                                                                                                                                                                                                                                                                                                                                                                                                                                                                                                                                                                                                                                                                                                                                                                                                                                        | TGGGGTATCTAAATCCCAAG *1a                                  | 10 (NTC: 2.5)           |  |  |  |
|                |                                 | cytb      | ~ 224            | for                                                                                                                                                                                                                                                                                                                                                                                                                                                                                                                                                                                                                                                                                                                                                                                                                                                                                                                                                                                                                                                                                                                                                                                                                                                                                                                                                                                                                                                                                                                                                                                                                                                                                                                                                                                                                                                                                                                                                                                                                                                                                                                                                                                                                                                                                                                                                                                                                                                                                                                                                                                                                                                                                                                                                                                                                                                                                                                                                                                                                                                                                                                                                                                                                                                                                                                                                                                                                                                                                                                                                                                                                                                                                                                                                                                                                                                                                                                                                                                                                                                                                                                                                                                                                                                                                                                                                                                                                                                                                                                                                                                                                                                                                                                                                                                                                                                                                                                                                                                                                                                                                                                                                                                                                                                                                                        | CCATGAGGCAAAATATCTTTTG *1b                                | 40 (NTC: 10)            |  |  |  |
|                |                                 |           |                  | rev                                                                                                                                                                                                                                                                                                                                                                                                                                                                                                                                                                                                                                                                                                                                                                                                                                                                                                                                                                                                                                                                                                                                                                                                                                                                                                                                                                                                                                                                                                                                                                                                                                                                                                                                                                                                                                                                                                                                                                                                                                                                                                                                                                                                                                                                                                                                                                                                                                                                                                                                                                                                                                                                                                                                                                                                                                                                                                                                                                                                                                                                                                                                                                                                                                                                                                                                                                                                                                                                                                                                                                                                                                                                                                                                                                                                                                                                                                                                                                                                                                                                                                                                                                                                                                                                                                                                                                                                                                                                                                                                                                                                                                                                                                                                                                                                                                                                                                                                                                                                                                                                                                                                                                                                                                                                                                        | GGGTTGTGATCCGTTTC *1b                                     | 40 (NTC: 10)            |  |  |  |
| Nested PCR *2  |                                 |           |                  |                                                                                                                                                                                                                                                                                                                                                                                                                                                                                                                                                                                                                                                                                                                                                                                                                                                                                                                                                                                                                                                                                                                                                                                                                                                                                                                                                                                                                                                                                                                                                                                                                                                                                                                                                                                                                                                                                                                                                                                                                                                                                                                                                                                                                                                                                                                                                                                                                                                                                                                                                                                                                                                                                                                                                                                                                                                                                                                                                                                                                                                                                                                                                                                                                                                                                                                                                                                                                                                                                                                                                                                                                                                                                                                                                                                                                                                                                                                                                                                                                                                                                                                                                                                                                                                                                                                                                                                                                                                                                                                                                                                                                                                                                                                                                                                                                                                                                                                                                                                                                                                                                                                                                                                                                                                                                                            |                                                           |                         |  |  |  |
| 1              | Equidae                         | 12S rRNA  | 172              | for                                                                                                                                                                                                                                                                                                                                                                                                                                                                                                                                                                                                                                                                                                                                                                                                                                                                                                                                                                                                                                                                                                                                                                                                                                                                                                                                                                                                                                                                                                                                                                                                                                                                                                                                                                                                                                                                                                                                                                                                                                                                                                                                                                                                                                                                                                                                                                                                                                                                                                                                                                                                                                                                                                                                                                                                                                                                                                                                                                                                                                                                                                                                                                                                                                                                                                                                                                                                                                                                                                                                                                                                                                                                                                                                                                                                                                                                                                                                                                                                                                                                                                                                                                                                                                                                                                                                                                                                                                                                                                                                                                                                                                                                                                                                                                                                                                                                                                                                                                                                                                                                                                                                                                                                                                                                                                        | AAGCGTGATATTGCTCTTTTCGTATAGCTCCGGGCTAAAGCGTGCAAAAGAC      | 4                       |  |  |  |
|                |                                 |           |                  | rev                                                                                                                                                                                                                                                                                                                                                                                                                                                                                                                                                                                                                                                                                                                                                                                                                                                                                                                                                                                                                                                                                                                                                                                                                                                                                                                                                                                                                                                                                                                                                                                                                                                                                                                                                                                                                                                                                                                                                                                                                                                                                                                                                                                                                                                                                                                                                                                                                                                                                                                                                                                                                                                                                                                                                                                                                                                                                                                                                                                                                                                                                                                                                                                                                                                                                                                                                                                                                                                                                                                                                                                                                                                                                                                                                                                                                                                                                                                                                                                                                                                                                                                                                                                                                                                                                                                                                                                                                                                                                                                                                                                                                                                                                                                                                                                                                                                                                                                                                                                                                                                                                                                                                                                                                                                                                                        | ACATAGCGACAGATTACAACATTAGTATTGGTCAAGAGTTAAAGTCACCTTCGTAG  | 4                       |  |  |  |
|                |                                 | cytb      | 128              | for                                                                                                                                                                                                                                                                                                                                                                                                                                                                                                                                                                                                                                                                                                                                                                                                                                                                                                                                                                                                                                                                                                                                                                                                                                                                                                                                                                                                                                                                                                                                                                                                                                                                                                                                                                                                                                                                                                                                                                                                                                                                                                                                                                                                                                                                                                                                                                                                                                                                                                                                                                                                                                                                                                                                                                                                                                                                                                                                                                                                                                                                                                                                                                                                                                                                                                                                                                                                                                                                                                                                                                                                                                                                                                                                                                                                                                                                                                                                                                                                                                                                                                                                                                                                                                                                                                                                                                                                                                                                                                                                                                                                                                                                                                                                                                                                                                                                                                                                                                                                                                                                                                                                                                                                                                                                                                        | GTAAACGACGGCCAGTGAAATCAACAAATTCCTCATCTGGTAC               | 4                       |  |  |  |
|                |                                 |           |                  | rev                                                                                                                                                                                                                                                                                                                                                                                                                                                                                                                                                                                                                                                                                                                                                                                                                                                                                                                                                                                                                                                                                                                                                                                                                                                                                                                                                                                                                                                                                                                                                                                                                                                                                                                                                                                                                                                                                                                                                                                                                                                                                                                                                                                                                                                                                                                                                                                                                                                                                                                                                                                                                                                                                                                                                                                                                                                                                                                                                                                                                                                                                                                                                                                                                                                                                                                                                                                                                                                                                                                                                                                                                                                                                                                                                                                                                                                                                                                                                                                                                                                                                                                                                                                                                                                                                                                                                                                                                                                                                                                                                                                                                                                                                                                                                                                                                                                                                                                                                                                                                                                                                                                                                                                                                                                                                                        | GGAAACAGCTATGACCATGGCAAAATTCGGGTAAAGGGTG                  | 4                       |  |  |  |
| 2              | Phasianidae                     | 12S rRNA  | 134              | for                                                                                                                                                                                                                                                                                                                                                                                                                                                                                                                                                                                                                                                                                                                                                                                                                                                                                                                                                                                                                                                                                                                                                                                                                                                                                                                                                                                                                                                                                                                                                                                                                                                                                                                                                                                                                                                                                                                                                                                                                                                                                                                                                                                                                                                                                                                                                                                                                                                                                                                                                                                                                                                                                                                                                                                                                                                                                                                                                                                                                                                                                                                                                                                                                                                                                                                                                                                                                                                                                                                                                                                                                                                                                                                                                                                                                                                                                                                                                                                                                                                                                                                                                                                                                                                                                                                                                                                                                                                                                                                                                                                                                                                                                                                                                                                                                                                                                                                                                                                                                                                                                                                                                                                                                                                                                                        | AAGCGTGATATTGCTCTTTTCGTATAGCGGTAAAGAGTGGGCACATG           | 0.5                     |  |  |  |
|                |                                 |           |                  | rev                                                                                                                                                                                                                                                                                                                                                                                                                                                                                                                                                                                                                                                                                                                                                                                                                                                                                                                                                                                                                                                                                                                                                                                                                                                                                                                                                                                                                                                                                                                                                                                                                                                                                                                                                                                                                                                                                                                                                                                                                                                                                                                                                                                                                                                                                                                                                                                                                                                                                                                                                                                                                                                                                                                                                                                                                                                                                                                                                                                                                                                                                                                                                                                                                                                                                                                                                                                                                                                                                                                                                                                                                                                                                                                                                                                                                                                                                                                                                                                                                                                                                                                                                                                                                                                                                                                                                                                                                                                                                                                                                                                                                                                                                                                                                                                                                                                                                                                                                                                                                                                                                                                                                                                                                                                                                                        | ACATAGCGACAGATTACAACATTAGTATTGAGGTGGATCTTGGGCTTAGACAGC    | 0.5                     |  |  |  |
|                |                                 | cytb      | 141              | for                                                                                                                                                                                                                                                                                                                                                                                                                                                                                                                                                                                                                                                                                                                                                                                                                                                                                                                                                                                                                                                                                                                                                                                                                                                                                                                                                                                                                                                                                                                                                                                                                                                                                                                                                                                                                                                                                                                                                                                                                                                                                                                                                                                                                                                                                                                                                                                                                                                                                                                                                                                                                                                                                                                                                                                                                                                                                                                                                                                                                                                                                                                                                                                                                                                                                                                                                                                                                                                                                                                                                                                                                                                                                                                                                                                                                                                                                                                                                                                                                                                                                                                                                                                                                                                                                                                                                                                                                                                                                                                                                                                                                                                                                                                                                                                                                                                                                                                                                                                                                                                                                                                                                                                                                                                                                                        | GTAAACGACGGCCAGTGAAATCAACAACTTCTCAACAAAT                  | 1                       |  |  |  |
|                |                                 |           |                  | rev                                                                                                                                                                                                                                                                                                                                                                                                                                                                                                                                                                                                                                                                                                                                                                                                                                                                                                                                                                                                                                                                                                                                                                                                                                                                                                                                                                                                                                                                                                                                                                                                                                                                                                                                                                                                                                                                                                                                                                                                                                                                                                                                                                                                                                                                                                                                                                                                                                                                                                                                                                                                                                                                                                                                                                                                                                                                                                                                                                                                                                                                                                                                                                                                                                                                                                                                                                                                                                                                                                                                                                                                                                                                                                                                                                                                                                                                                                                                                                                                                                                                                                                                                                                                                                                                                                                                                                                                                                                                                                                                                                                                                                                                                                                                                                                                                                                                                                                                                                                                                                                                                                                                                                                                                                                                                                        | GGAAACAGCTATGACCATGCGAAAGAAATTCGGGTGAAGGGTGGG             | 1                       |  |  |  |
| 3              | Felidae                         | 12S rRNA  | 168              | for                                                                                                                                                                                                                                                                                                                                                                                                                                                                                                                                                                                                                                                                                                                                                                                                                                                                                                                                                                                                                                                                                                                                                                                                                                                                                                                                                                                                                                                                                                                                                                                                                                                                                                                                                                                                                                                                                                                                                                                                                                                                                                                                                                                                                                                                                                                                                                                                                                                                                                                                                                                                                                                                                                                                                                                                                                                                                                                                                                                                                                                                                                                                                                                                                                                                                                                                                                                                                                                                                                                                                                                                                                                                                                                                                                                                                                                                                                                                                                                                                                                                                                                                                                                                                                                                                                                                                                                                                                                                                                                                                                                                                                                                                                                                                                                                                                                                                                                                                                                                                                                                                                                                                                                                                                                                                                        | AAGCGTGATATTGCTCTTTTCGTATAGAACCCAACTAATAGACCCACGG         | 3                       |  |  |  |
|                |                                 |           |                  | rev                                                                                                                                                                                                                                                                                                                                                                                                                                                                                                                                                                                                                                                                                                                                                                                                                                                                                                                                                                                                                                                                                                                                                                                                                                                                                                                                                                                                                                                                                                                                                                                                                                                                                                                                                                                                                                                                                                                                                                                                                                                                                                                                                                                                                                                                                                                                                                                                                                                                                                                                                                                                                                                                                                                                                                                                                                                                                                                                                                                                                                                                                                                                                                                                                                                                                                                                                                                                                                                                                                                                                                                                                                                                                                                                                                                                                                                                                                                                                                                                                                                                                                                                                                                                                                                                                                                                                                                                                                                                                                                                                                                                                                                                                                                                                                                                                                                                                                                                                                                                                                                                                                                                                                                                                                                                                                        | ACATAGCGACAGATTACAACATTAGTATTGGTGCTGTATTTTTATGTAACTGTAGCT | 3                       |  |  |  |
|                |                                 | cytb      | 147              | for                                                                                                                                                                                                                                                                                                                                                                                                                                                                                                                                                                                                                                                                                                                                                                                                                                                                                                                                                                                                                                                                                                                                                                                                                                                                                                                                                                                                                                                                                                                                                                                                                                                                                                                                                                                                                                                                                                                                                                                                                                                                                                                                                                                                                                                                                                                                                                                                                                                                                                                                                                                                                                                                                                                                                                                                                                                                                                                                                                                                                                                                                                                                                                                                                                                                                                                                                                                                                                                                                                                                                                                                                                                                                                                                                                                                                                                                                                                                                                                                                                                                                                                                                                                                                                                                                                                                                                                                                                                                                                                                                                                                                                                                                                                                                                                                                                                                                                                                                                                                                                                                                                                                                                                                                                                                                                        | GTAAACGACGGCCAGTGAAAGATGAATCTGAGGGGGCTTC                  | 3                       |  |  |  |
|                |                                 |           |                  | rev                                                                                                                                                                                                                                                                                                                                                                                                                                                                                                                                                                                                                                                                                                                                                                                                                                                                                                                                                                                                                                                                                                                                                                                                                                                                                                                                                                                                                                                                                                                                                                                                                                                                                                                                                                                                                                                                                                                                                                                                                                                                                                                                                                                                                                                                                                                                                                                                                                                                                                                                                                                                                                                                                                                                                                                                                                                                                                                                                                                                                                                                                                                                                                                                                                                                                                                                                                                                                                                                                                                                                                                                                                                                                                                                                                                                                                                                                                                                                                                                                                                                                                                                                                                                                                                                                                                                                                                                                                                                                                                                                                                                                                                                                                                                                                                                                                                                                                                                                                                                                                                                                                                                                                                                                                                                                                        | GGAAACAGCTATGACCATGGAGGGTGACTGCTGCTAGGGCTGA               | 3                       |  |  |  |
| 4              | Homo Sapiens                    | 12S rRNA  | 155              | for                                                                                                                                                                                                                                                                                                                                                                                                                                                                                                                                                                                                                                                                                                                                                                                                                                                                                                                                                                                                                                                                                                                                                                                                                                                                                                                                                                                                                                                                                                                                                                                                                                                                                                                                                                                                                                                                                                                                                                                                                                                                                                                                                                                                                                                                                                                                                                                                                                                                                                                                                                                                                                                                                                                                                                                                                                                                                                                                                                                                                                                                                                                                                                                                                                                                                                                                                                                                                                                                                                                                                                                                                                                                                                                                                                                                                                                                                                                                                                                                                                                                                                                                                                                                                                                                                                                                                                                                                                                                                                                                                                                                                                                                                                                                                                                                                                                                                                                                                                                                                                                                                                                                                                                                                                                                                                        | AAGCGTGATATTGCTCTTTTCGTATAGAGTGTTTAGATGACACCCCTCCCC       | 1                       |  |  |  |
|                |                                 |           |                  | rev                                                                                                                                                                                                                                                                                                                                                                                                                                                                                                                                                                                                                                                                                                                                                                                                                                                                                                                                                                                                                                                                                                                                                                                                                                                                                                                                                                                                                                                                                                                                                                                                                                                                                                                                                                                                                                                                                                                                                                                                                                                                                                                                                                                                                                                                                                                                                                                                                                                                                                                                                                                                                                                                                                                                                                                                                                                                                                                                                                                                                                                                                                                                                                                                                                                                                                                                                                                                                                                                                                                                                                                                                                                                                                                                                                                                                                                                                                                                                                                                                                                                                                                                                                                                                                                                                                                                                                                                                                                                                                                                                                                                                                                                                                                                                                                                                                                                                                                                                                                                                                                                                                                                                                                                                                                                                                        | ACATAGCGACAGATTACAACATTAGTATTGAAGTTAAAGCCACTTTCGTAGT      | 1                       |  |  |  |
|                |                                 | cytb      | 141              | for                                                                                                                                                                                                                                                                                                                                                                                                                                                                                                                                                                                                                                                                                                                                                                                                                                                                                                                                                                                                                                                                                                                                                                                                                                                                                                                                                                                                                                                                                                                                                                                                                                                                                                                                                                                                                                                                                                                                                                                                                                                                                                                                                                                                                                                                                                                                                                                                                                                                                                                                                                                                                                                                                                                                                                                                                                                                                                                                                                                                                                                                                                                                                                                                                                                                                                                                                                                                                                                                                                                                                                                                                                                                                                                                                                                                                                                                                                                                                                                                                                                                                                                                                                                                                                                                                                                                                                                                                                                                                                                                                                                                                                                                                                                                                                                                                                                                                                                                                                                                                                                                                                                                                                                                                                                                                                        | GTAAACGACGGCCAGTGAGGCCACAGTAATTAACAACTACTATC              | 2.5                     |  |  |  |
|                |                                 |           |                  | rev                                                                                                                                                                                                                                                                                                                                                                                                                                                                                                                                                                                                                                                                                                                                                                                                                                                                                                                                                                                                                                                                                                                                                                                                                                                                                                                                                                                                                                                                                                                                                                                                                                                                                                                                                                                                                                                                                                                                                                                                                                                                                                                                                                                                                                                                                                                                                                                                                                                                                                                                                                                                                                                                                                                                                                                                                                                                                                                                                                                                                                                                                                                                                                                                                                                                                                                                                                                                                                                                                                                                                                                                                                                                                                                                                                                                                                                                                                                                                                                                                                                                                                                                                                                                                                                                                                                                                                                                                                                                                                                                                                                                                                                                                                                                                                                                                                                                                                                                                                                                                                                                                                                                                                                                                                                                                                        | GGAAACAGCTATGACCATGTGTGAGGGTGGGACTGTCTCTGAGTA             | 2.5                     |  |  |  |
| 5              | Sus scrofa                      | 12S rRNA  | 198              | for                                                                                                                                                                                                                                                                                                                                                                                                                                                                                                                                                                                                                                                                                                                                                                                                                                                                                                                                                                                                                                                                                                                                                                                                                                                                                                                                                                                                                                                                                                                                                                                                                                                                                                                                                                                                                                                                                                                                                                                                                                                                                                                                                                                                                                                                                                                                                                                                                                                                                                                                                                                                                                                                                                                                                                                                                                                                                                                                                                                                                                                                                                                                                                                                                                                                                                                                                                                                                                                                                                                                                                                                                                                                                                                                                                                                                                                                                                                                                                                                                                                                                                                                                                                                                                                                                                                                                                                                                                                                                                                                                                                                                                                                                                                                                                                                                                                                                                                                                                                                                                                                                                                                                                                                                                                                                                        | AAGCGTGATATTGCTCTTTTCGTATAGTAAACCCAAATTAAGATGACCGGGT      | 2                       |  |  |  |
|                |                                 |           |                  | rev                                                                                                                                                                                                                                                                                                                                                                                                                                                                                                                                                                                                                                                                                                                                                                                                                                                                                                                                                                                                                                                                                                                                                                                                                                                                                                                                                                                                                                                                                                                                                                                                                                                                                                                                                                                                                                                                                                                                                                                                                                                                                                                                                                                                                                                                                                                                                                                                                                                                                                                                                                                                                                                                                                                                                                                                                                                                                                                                                                                                                                                                                                                                                                                                                                                                                                                                                                                                                                                                                                                                                                                                                                                                                                                                                                                                                                                                                                                                                                                                                                                                                                                                                                                                                                                                                                                                                                                                                                                                                                                                                                                                                                                                                                                                                                                                                                                                                                                                                                                                                                                                                                                                                                                                                                                                                                        | ACATAGCGACAGATTACAACATTAGTATTGTGCTGTGACGAGTATTAAGTCACT    | 2                       |  |  |  |
|                |                                 | cytb      | 135              | for                                                                                                                                                                                                                                                                                                                                                                                                                                                                                                                                                                                                                                                                                                                                                                                                                                                                                                                                                                                                                                                                                                                                                                                                                                                                                                                                                                                                                                                                                                                                                                                                                                                                                                                                                                                                                                                                                                                                                                                                                                                                                                                                                                                                                                                                                                                                                                                                                                                                                                                                                                                                                                                                                                                                                                                                                                                                                                                                                                                                                                                                                                                                                                                                                                                                                                                                                                                                                                                                                                                                                                                                                                                                                                                                                                                                                                                                                                                                                                                                                                                                                                                                                                                                                                                                                                                                                                                                                                                                                                                                                                                                                                                                                                                                                                                                                                                                                                                                                                                                                                                                                                                                                                                                                                                                                                        | GTAAACGACGGCCAGTGATACGGTCAACAAATCTACTATCA                 | 2                       |  |  |  |
|                |                                 |           |                  | rev                                                                                                                                                                                                                                                                                                                                                                                                                                                                                                                                                                                                                                                                                                                                                                                                                                                                                                                                                                                                                                                                                                                                                                                                                                                                                                                                                                                                                                                                                                                                                                                                                                                                                                                                                                                                                                                                                                                                                                                                                                                                                                                                                                                                                                                                                                                                                                                                                                                                                                                                                                                                                                                                                                                                                                                                                                                                                                                                                                                                                                                                                                                                                                                                                                                                                                                                                                                                                                                                                                                                                                                                                                                                                                                                                                                                                                                                                                                                                                                                                                                                                                                                                                                                                                                                                                                                                                                                                                                                                                                                                                                                                                                                                                                                                                                                                                                                                                                                                                                                                                                                                                                                                                                                                                                                                                        | GGAAACAGCTATGACCATGGAGGGTGTCTTGTGTCAGGAAAGGCC             | 2                       |  |  |  |
| 6              | Cervidae                        | 12S rRNA  | 150              | for                                                                                                                                                                                                                                                                                                                                                                                                                                                                                                                                                                                                                                                                                                                                                                                                                                                                                                                                                                                                                                                                                                                                                                                                                                                                                                                                                                                                                                                                                                                                                                                                                                                                                                                                                                                                                                                                                                                                                                                                                                                                                                                                                                                                                                                                                                                                                                                                                                                                                                                                                                                                                                                                                                                                                                                                                                                                                                                                                                                                                                                                                                                                                                                                                                                                                                                                                                                                                                                                                                                                                                                                                                                                                                                                                                                                                                                                                                                                                                                                                                                                                                                                                                                                                                                                                                                                                                                                                                                                                                                                                                                                                                                                                                                                                                                                                                                                                                                                                                                                                                                                                                                                                                                                                                                                                                        | AAGCGTGATATTGCTCTTTTCGTATAGCCCAAGTAAATAGCAACGGGG          | 1.5                     |  |  |  |
|                |                                 |           |                  | rev                                                                                                                                                                                                                                                                                                                                                                                                                                                                                                                                                                                                                                                                                                                                                                                                                                                                                                                                                                                                                                                                                                                                                                                                                                                                                                                                                                                                                                                                                                                                                                                                                                                                                                                                                                                                                                                                                                                                                                                                                                                                                                                                                                                                                                                                                                                                                                                                                                                                                                                                                                                                                                                                                                                                                                                                                                                                                                                                                                                                                                                                                                                                                                                                                                                                                                                                                                                                                                                                                                                                                                                                                                                                                                                                                                                                                                                                                                                                                                                                                                                                                                                                                                                                                                                                                                                                                                                                                                                                                                                                                                                                                                                                                                                                                                                                                                                                                                                                                                                                                                                                                                                                                                                                                                                                                                        | ACATAGCGACAGATTACAACATTAGTATTGGGTCTGACTGCTATGCTTTCA       | 1.5                     |  |  |  |
|                |                                 | cytb      | 98               | for                                                                                                                                                                                                                                                                                                                                                                                                                                                                                                                                                                                                                                                                                                                                                                                                                                                                                                                                                                                                                                                                                                                                                                                                                                                                                                                                                                                                                                                                                                                                                                                                                                                                                                                                                                                                                                                                                                                                                                                                                                                                                                                                                                                                                                                                                                                                                                                                                                                                                                                                                                                                                                                                                                                                                                                                                                                                                                                                                                                                                                                                                                                                                                                                                                                                                                                                                                                                                                                                                                                                                                                                                                                                                                                                                                                                                                                                                                                                                                                                                                                                                                                                                                                                                                                                                                                                                                                                                                                                                                                                                                                                                                                                                                                                                                                                                                                                                                                                                                                                                                                                                                                                                                                                                                                                                                        | GTAAACGACGGCCAGTGAGGAGGCTTTTCAATGACAAAGCAACC              | 2                       |  |  |  |
|                |                                 |           |                  | rev                                                                                                                                                                                                                                                                                                                                                                                                                                                                                                                                                                                                                                                                                                                                                                                                                                                                                                                                                                                                                                                                                                                                                                                                                                                                                                                                                                                                                                                                                                                                                                                                                                                                                                                                                                                                                                                                                                                                                                                                                                                                                                                                                                                                                                                                                                                                                                                                                                                                                                                                                                                                                                                                                                                                                                                                                                                                                                                                                                                                                                                                                                                                                                                                                                                                                                                                                                                                                                                                                                                                                                                                                                                                                                                                                                                                                                                                                                                                                                                                                                                                                                                                                                                                                                                                                                                                                                                                                                                                                                                                                                                                                                                                                                                                                                                                                                                                                                                                                                                                                                                                                                                                                                                                                                                                                                        | GGAAACAGCTATGACCATGTAAAGTGTACTATAGCGAGTCTGCGA             | 2                       |  |  |  |
| 7              | Bovini                          | 12S rRNA  | 137              | for                                                                                                                                                                                                                                                                                                                                                                                                                                                                                                                                                                                                                                                                                                                                                                                                                                                                                                                                                                                                                                                                                                                                                                                                                                                                                                                                                                                                                                                                                                                                                                                                                                                                                                                                                                                                                                                                                                                                                                                                                                                                                                                                                                                                                                                                                                                                                                                                                                                                                                                                                                                                                                                                                                                                                                                                                                                                                                                                                                                                                                                                                                                                                                                                                                                                                                                                                                                                                                                                                                                                                                                                                                                                                                                                                                                                                                                                                                                                                                                                                                                                                                                                                                                                                                                                                                                                                                                                                                                                                                                                                                                                                                                                                                                                                                                                                                                                                                                                                                                                                                                                                                                                                                                                                                                                                                        | AAGCGTGATATTGCTCTTTTCGTATAGCCCAACCAATCAACAAATAGGGTTAAATCT | 3                       |  |  |  |
|                |                                 |           |                  | rev                                                                                                                                                                                                                                                                                                                                                                                                                                                                                                                                                                                                                                                                                                                                                                                                                                                                                                                                                                                                                                                                                                                                                                                                                                                                                                                                                                                                                                                                                                                                                                                                                                                                                                                                                                                                                                                                                                                                                                                                                                                                                                                                                                                                                                                                                                                                                                                                                                                                                                                                                                                                                                                                                                                                                                                                                                                                                                                                                                                                                                                                                                                                                                                                                                                                                                                                                                                                                                                                                                                                                                                                                                                                                                                                                                                                                                                                                                                                                                                                                                                                                                                                                                                                                                                                                                                                                                                                                                                                                                                                                                                                                                                                                                                                                                                                                                                                                                                                                                                                                                                                                                                                                                                                                                                                                                        | ACATAGCGACAGATTACAACATTAGTATTGGGGTCACTTCTGCTATTTATTTTA    | 3                       |  |  |  |
|                |                                 | cytb      | 159              | for                                                                                                                                                                                                                                                                                                                                                                                                                                                                                                                                                                                                                                                                                                                                                                                                                                                                                                                                                                                                                                                                                                                                                                                                                                                                                                                                                                                                                                                                                                                                                                                                                                                                                                                                                                                                                                                                                                                                                                                                                                                                                                                                                                                                                                                                                                                                                                                                                                                                                                                                                                                                                                                                                                                                                                                                                                                                                                                                                                                                                                                                                                                                                                                                                                                                                                                                                                                                                                                                                                                                                                                                                                                                                                                                                                                                                                                                                                                                                                                                                                                                                                                                                                                                                                                                                                                                                                                                                                                                                                                                                                                                                                                                                                                                                                                                                                                                                                                                                                                                                                                                                                                                                                                                                                                                                                        | GTAAACGACGGCCAGTGACCCATACATCGGCAAAATTTAGTCT               | 2                       |  |  |  |
|                |                                 |           |                  | rev                                                                                                                                                                                                                                                                                                                                                                                                                                                                                                                                                                                                                                                                                                                                                                                                                                                                                                                                                                                                                                                                                                                                                                                                                                                                                                                                                                                                                                                                                                                                                                                                                                                                                                                                                                                                                                                                                                                                                                                                                                                                                                                                                                                                                                                                                                                                                                                                                                                                                                                                                                                                                                                                                                                                                                                                                                                                                                                                                                                                                                                                                                                                                                                                                                                                                                                                                                                                                                                                                                                                                                                                                                                                                                                                                                                                                                                                                                                                                                                                                                                                                                                                                                                                                                                                                                                                                                                                                                                                                                                                                                                                                                                                                                                                                                                                                                                                                                                                                                                                                                                                                                                                                                                                                                                                                                        | GGAAACAGCTATGACCATGGGCAATTTGCTATGATGATAAATGGAAGGA         | 2                       |  |  |  |
| 8              | Canidae                         | 12S rRNA  | 189              | for                                                                                                                                                                                                                                                                                                                                                                                                                                                                                                                                                                                                                                                                                                                                                                                                                                                                                                                                                                                                                                                                                                                                                                                                                                                                                                                                                                                                                                                                                                                                                                                                                                                                                                                                                                                                                                                                                                                                                                                                                                                                                                                                                                                                                                                                                                                                                                                                                                                                                                                                                                                                                                                                                                                                                                                                                                                                                                                                                                                                                                                                                                                                                                                                                                                                                                                                                                                                                                                                                                                                                                                                                                                                                                                                                                                                                                                                                                                                                                                                                                                                                                                                                                                                                                                                                                                                                                                                                                                                                                                                                                                                                                                                                                                                                                                                                                                                                                                                                                                                                                                                                                                                                                                                                                                                                                        | AAGCGTGATATTGCTCTTTTCGTATAGCTAAATGGCTACGGGGTAAAG          | 1                       |  |  |  |
|                |                                 |           |                  | rev                                                                                                                                                                                                                                                                                                                                                                                                                                                                                                                                                                                                                                                                                                                                                                                                                                                                                                                                                                                                                                                                                                                                                                                                                                                                                                                                                                                                                                                                                                                                                                                                                                                                                                                                                                                                                                                                                                                                                                                                                                                                                                                                                                                                                                                                                                                                                                                                                                                                                                                                                                                                                                                                                                                                                                                                                                                                                                                                                                                                                                                                                                                                                                                                                                                                                                                                                                                                                                                                                                                                                                                                                                                                                                                                                                                                                                                                                                                                                                                                                                                                                                                                                                                                                                                                                                                                                                                                                                                                                                                                                                                                                                                                                                                                                                                                                                                                                                                                                                                                                                                                                                                                                                                                                                                                                                        | ACATAGCGACAGATTACAACATTAGTATTGATGGTGTAGTGAATTTATAAAGTCAC  | 1                       |  |  |  |
|                |                                 | cytb      | 133              | for                                                                                                                                                                                                                                                                                                                                                                                                                                                                                                                                                                                                                                                                                                                                                                                                                                                                                                                                                                                                                                                                                                                                                                                                                                                                                                                                                                                                                                                                                                                                                                                                                                                                                                                                                                                                                                                                                                                                                                                                                                                                                                                                                                                                                                                                                                                                                                                                                                                                                                                                                                                                                                                                                                                                                                                                                                                                                                                                                                                                                                                                                                                                                                                                                                                                                                                                                                                                                                                                                                                                                                                                                                                                                                                                                                                                                                                                                                                                                                                                                                                                                                                                                                                                                                                                                                                                                                                                                                                                                                                                                                                                                                                                                                                                                                                                                                                                                                                                                                                                                                                                                                                                                                                                                                                                                                        | GTAAACGACGGCCAGTGAACTAATCTTCTCTGCTATCTC                   | 0.5                     |  |  |  |
|                |                                 |           |                  | rev                                                                                                                                                                                                                                                                                                                                                                                                                                                                                                                                                                                                                                                                                                                                                                                                                                                                                                                                                                                                                                                                                                                                                                                                                                                                                                                                                                                                                                                                                                                                                                                                                                                                                                                                                                                                                                                                                                                                                                                                                                                                                                                                                                                                                                                                                                                                                                                                                                                                                                                                                                                                                                                                                                                                                                                                                                                                                                                                                                                                                                                                                                                                                                                                                                                                                                                                                                                                                                                                                                                                                                                                                                                                                                                                                                                                                                                                                                                                                                                                                                                                                                                                                                                                                                                                                                                                                                                                                                                                                                                                                                                                                                                                                                                                                                                                                                                                                                                                                                                                                                                                                                                                                                                                                                                                                                        | GTAAACGACGGCCAGTGAACTAATCTTCTCTGCTATCTC                   | 0.5                     |  |  |  |
| 9              | Leporidae                       | 12S rRNA  | 159-160          | for                                                                                                                                                                                                                                                                                                                                                                                                                                                                                                                                                                                                                                                                                                                                                                                                                                                                                                                                                                                                                                                                                                                                                                                                                                                                                                                                                                                                                                                                                                                                                                                                                                                                                                                                                                                                                                                                                                                                                                                                                                                                                                                                                                                                                                                                                                                                                                                                                                                                                                                                                                                                                                                                                                                                                                                                                                                                                                                                                                                                                                                                                                                                                                                                                                                                                                                                                                                                                                                                                                                                                                                                                                                                                                                                                                                                                                                                                                                                                                                                                                                                                                                                                                                                                                                                                                                                                                                                                                                                                                                                                                                                                                                                                                                                                                                                                                                                                                                                                                                                                                                                                                                                                                                                                                                                                                        | AAGCGTGATATTGCTCTTTTCGTATAGCCGCGGTAAAGCGGTATGAGAATA       | 1.5                     |  |  |  |
|                |                                 |           |                  | rev                                                                                                                                                                                                                                                                                                                                                                                                                                                                                                                                                                                                                                                                                                                                                                                                                                                                                                                                                                                                                                                                                                                                                                                                                                                                                                                                                                                                                                                                                                                                                                                                                                                                                                                                                                                                                                                                                                                                                                                                                                                                                                                                                                                                                                                                                                                                                                                                                                                                                                                                                                                                                                                                                                                                                                                                                                                                                                                                                                                                                                                                                                                                                                                                                                                                                                                                                                                                                                                                                                                                                                                                                                                                                                                                                                                                                                                                                                                                                                                                                                                                                                                                                                                                                                                                                                                                                                                                                                                                                                                                                                                                                                                                                                                                                                                                                                                                                                                                                                                                                                                                                                                                                                                                                                                                                                        | ACATAGCGACAGATTACAACATTAGTATTGAAATCACTTTCGTTGTTATTTTGT    | 1.5                     |  |  |  |
|                |                                 | cytb      | 117              | for                                                                                                                                                                                                                                                                                                                                                                                                                                                                                                                                                                                                                                                                                                                                                                                                                                                                                                                                                                                                                                                                                                                                                                                                                                                                                                                                                                                                                                                                                                                                                                                                                                                                                                                                                                                                                                                                                                                                                                                                                                                                                                                                                                                                                                                                                                                                                                                                                                                                                                                                                                                                                                                                                                                                                                                                                                                                                                                                                                                                                                                                                                                                                                                                                                                                                                                                                                                                                                                                                                                                                                                                                                                                                                                                                                                                                                                                                                                                                                                                                                                                                                                                                                                                                                                                                                                                                                                                                                                                                                                                                                                                                                                                                                                                                                                                                                                                                                                                                                                                                                                                                                                                                                                                                                                                                                        | GTAAACGACGGCCAGTGAAACCAACCTAGTTGAAATGAATCTGAGGA           | 1.5                     |  |  |  |
|                |                                 |           |                  | rev                                                                                                                                                                                                                                                                                                                                                                                                                                                                                                                                                                                                                                                                                                                                                                                                                                                                                                                                                                                                                                                                                                                                                                                                                                                                                                                                                                                                                                                                                                                                                                                                                                                                                                                                                                                                                                                                                                                                                                                                                                                                                                                                                                                                                                                                                                                                                                                                                                                                                                                                                                                                                                                                                                                                                                                                                                                                                                                                                                                                                                                                                                                                                                                                                                                                                                                                                                                                                                                                                                                                                                                                                                                                                                                                                                                                                                                                                                                                                                                                                                                                                                                                                                                                                                                                                                                                                                                                                                                                                                                                                                                                                                                                                                                                                                                                                                                                                                                                                                                                                                                                                                                                                                                                                                                                                                        | GGAAACAGCTATGACCATGGAAGTGGAAAGCGGAAGATCGG                 | 1.5                     |  |  |  |
| 10             | Mustelidae                      | 12S rRNA  | 132-133          | for                                                                                                                                                                                                                                                                                                                                                                                                                                                                                                                                                                                                                                                                                                                                                                                                                                                                                                                                                                                                                                                                                                                                                                                                                                                                                                                                                                                                                                                                                                                                                                                                                                                                                                                                                                                                                                                                                                                                                                                                                                                                                                                                                                                                                                                                                                                                                                                                                                                                                                                                                                                                                                                                                                                                                                                                                                                                                                                                                                                                                                                                                                                                                                                                                                                                                                                                                                                                                                                                                                                                                                                                                                                                                                                                                                                                                                                                                                                                                                                                                                                                                                                                                                                                                                                                                                                                                                                                                                                                                                                                                                                                                                                                                                                                                                                                                                                                                                                                                                                                                                                                                                                                                                                                                                                                                                        | AAGCGTGATATTGCTCTTTTCGTATAGACGGCGTAAACAGTGTAAAG           | 1                       |  |  |  |
|                |                                 |           |                  | rev                                                                                                                                                                                                                                                                                                                                                                                                                                                                                                                                                                                                                                                                                                                                                                                                                                                                                                                                                                                                                                                                                                                                                                                                                                                                                                                                                                                                                                                                                                                                                                                                                                                                                                                                                                                                                                                                                                                                                                                                                                                                                                                                                                                                                                                                                                                                                                                                                                                                                                                                                                                                                                                                                                                                                                                                                                                                                                                                                                                                                                                                                                                                                                                                                                                                                                                                                                                                                                                                                                                                                                                                                                                                                                                                                                                                                                                                                                                                                                                                                                                                                                                                                                                                                                                                                                                                                                                                                                                                                                                                                                                                                                                                                                                                                                                                                                                                                                                                                                                                                                                                                                                                                                                                                                                                                                        | ACATAGCGACAGATTACAACATTAGTATTGTTAAACAGATCTTTTACGGCCT      | 2                       |  |  |  |
|                |                                 | cytb      | 175              | for                                                                                                                                                                                                                                                                                                                                                                                                                                                                                                                                                                                                                                                                                                                                                                                                                                                                                                                                                                                                                                                                                                                                                                                                                                                                                                                                                                                                                                                                                                                                                                                                                                                                                                                                                                                                                                                                                                                                                                                                                                                                                                                                                                                                                                                                                                                                                                                                                                                                                                                                                                                                                                                                                                                                                                                                                                                                                                                                                                                                                                                                                                                                                                                                                                                                                                                                                                                                                                                                                                                                                                                                                                                                                                                                                                                                                                                                                                                                                                                                                                                                                                                                                                                                                                                                                                                                                                                                                                                                                                                                                                                                                                                                                                                                                                                                                                                                                                                                                                                                                                                                                                                                                                                                                                                                                                        | GTAAACGACGGCCAGTGAGCAACCGTAATTACCAACTTACTGTC              | 3                       |  |  |  |
|                |                                 |           |                  | rev                                                                                                                                                                                                                                                                                                                                                                                                                                                                                                                                                                                                                                                                                                                                                                                                                                                                                                                                                                                                                                                                                                                                                                                                                                                                                                                                                                                                                                                                                                                                                                                                                                                                                                                                                                                                                                                                                                                                                                                                                                                                                                                                                                                                                                                                                                                                                                                                                                                                                                                                                                                                                                                                                                                                                                                                                                                                                                                                                                                                                                                                                                                                                                                                                                                                                                                                                                                                                                                                                                                                                                                                                                                                                                                                                                                                                                                                                                                                                                                                                                                                                                                                                                                                                                                                                                                                                                                                                                                                                                                                                                                                                                                                                                                                                                                                                                                                                                                                                                                                                                                                                                                                                                                                                                                                                                        | GTAAACGACGGCCAGTGAGCAACCGTAATTACATAACTACTTATGTCT          | 3                       |  |  |  |
| 11             | Rodentia<br>(Muridae/Sciuridae) | 12S rRNA  | 150-151          | for                                                                                                                                                                                                                                                                                                                                                                                                                                                                                                                                                                                                                                                                                                                                                                                                                                                                                                                                                                                                                                                                                                                                                                                                                                                                                                                                                                                                                                                                                                                                                                                                                                                                                                                                                                                                                                                                                                                                                                                                                                                                                                                                                                                                                                                                                                                                                                                                                                                                                                                                                                                                                                                                                                                                                                                                                                                                                                                                                                                                                                                                                                                                                                                                                                                                                                                                                                                                                                                                                                                                                                                                                                                                                                                                                                                                                                                                                                                                                                                                                                                                                                                                                                                                                                                                                                                                                                                                                                                                                                                                                                                                                                                                                                                                                                                                                                                                                                                                                                                                                                                                                                                                                                                                                                                                                                        | GTAAACGACGGCCAGTGAGCAACCGTAATTACCAACTTACTGTC              | 3                       |  |  |  |
|                |                                 |           |                  | rev                                                                                                                                                                                                                                                                                                                                                                                                                                                                                                                                                                                                                                                                                                                                                                                                                                                                                                                                                                                                                                                                                                                                                                                                                                                                                                                                                                                                                                                                                                                                                                                                                                                                                                                                                                                                                                                                                                                                                                                                                                                                                                                                                                                                                                                                                                                                                                                                                                                                                                                                                                                                                                                                                                                                                                                                                                                                                                                                                                                                                                                                                                                                                                                                                                                                                                                                                                                                                                                                                                                                                                                                                                                                                                                                                                                                                                                                                                                                                                                                                                                                                                                                                                                                                                                                                                                                                                                                                                                                                                                                                                                                                                                                                                                                                                                                                                                                                                                                                                                                                                                                                                                                                                                                                                                                                                        | GTAAACGACGGCCAGTGAGCAACCGTAATTACATAACTACTTATGTCT          | 3                       |  |  |  |
|                |                                 | cytb      | 144-146          | for                                                                                                                                                                                                                                                                                                                                                                                                                                                                                                                                                                                                                                                                                                                                                                                                                                                                                                                                                                                                                                                                                                                                                                                                                                                                                                                                                                                                                                                                                                                                                                                                                                                                                                                                                                                                                                                                                                                                                                                                                                                                                                                                                                                                                                                                                                                                                                                                                                                                                                                                                                                                                                                                                                                                                                                                                                                                                                                                                                                                                                                                                                                                                                                                                                                                                                                                                                                                                                                                                                                                                                                                                                                                                                                                                                                                                                                                                                                                                                                                                                                                                                                                                                                                                                                                                                                                                                                                                                                                                                                                                                                                                                                                                                                                                                                                                                                                                                                                                                                                                                                                                                                                                                                                                                                                                                        | GTAAACGACGGCCAGTGAGCAACCGTAATTACCAACTTACTGTC              | 0.5                     |  |  |  |
|                |                                 |           |                  | rev                                                                                                                                                                                                                                                                                                                                                                                                                                                                                                                                                                                                                                                                                                                                                                                                                                                                                                                                                                                                                                                                                                                                                                                                                                                                                                                                                                                                                                                                                                                                                                                                                                                                                                                                                                                                                                                                                                                                                                                                                                                                                                                                                                                                                                                                                                                                                                                                                                                                                                                                                                                                                                                                                                                                                                                                                                                                                                                                                                                                                                                                                                                                                                                                                                                                                                                                                                                                                                                                                                                                                                                                                                                                                                                                                                                                                                                                                                                                                                                                                                                                                                                                                                                                                                                                                                                                                                                                                                                                                                                                                                                                                                                                                                                                                                                                                                                                                                                                                                                                                                                                                                                                                                                                                                                                                                        | GTAAACGACGGCCAGTGAGCAACCGTAATTACCAACTTACTGTC              | 0.5                     |  |  |  |
| 12             | Caprinae                        | 12S rRNA  | 185              | for                                                                                                                                                                                                                                                                                                                                                                                                                                                                                                                                                                                                                                                                                                                                                                                                                                                                                                                                                                                                                                                                                                                                                                                                                                                                                                                                                                                                                                                                                                                                                                                                                                                                                                                                                                                                                                                                                                                                                                                                                                                                                                                                                                                                                                                                                                                                                                                                                                                                                                                                                                                                                                                                                                                                                                                                                                                                                                                                                                                                                                                                                                                                                                                                                                                                                                                                                                                                                                                                                                                                                                                                                                                                                                                                                                                                                                                                                                                                                                                                                                                                                                                                                                                                                                                                                                                                                                                                                                                                                                                                                                                                                                                                                                                                                                                                                                                                                                                                                                                                                                                                                                                                                                                                                                                                                                        | AAGCGTGATATTGCTCTTTTCGTATAGCGTAAAGCGTGTAAAGCATCACT        | 1                       |  |  |  |
|                |                                 |           |                  | rev                                                                                                                                                                                                                                                                                                                                                                                                                                                                                                                                                                                                                                                                                                                                                                                                                                                                                                                                                                                                                                                                                                                                                                                                                                                                                                                                                                                                                                                                                                                                                                                                                                                                                                                                                                                                                                                                                                                                                                                                                                                                                                                                                                                                                                                                                                                                                                                                                                                                                                                                                                                                                                                                                                                                                                                                                                                                                                                                                                                                                                                                                                                                                                                                                                                                                                                                                                                                                                                                                                                                                                                                                                                                                                                                                                                                                                                                                                                                                                                                                                                                                                                                                                                                                                                                                                                                                                                                                                                                                                                                                                                                                                                                                                                                                                                                                                                                                                                                                                                                                                                                                                                                                                                                                                                                                                        | AAGCGTGATATTGCTCTTTTCGTATAGCGTAAAGCGTGTAAAGCATCACT        | 1                       |  |  |  |
|                |                                 | cytb      | 152              | for                                                                                                                                                                                                                                                                                                                                                                                                                                                                                                                                                                                                                                                                                                                                                                                                                                                                                                                                                                                                                                                                                                                                                                                                                                                                                                                                                                                                                                                                                                                                                                                                                                                                                                                                                                                                                                                                                                                                                                                                                                                                                                                                                                                                                                                                                                                                                                                                                                                                                                                                                                                                                                                                                                                                                                                                                                                                                                                                                                                                                                                                                                                                                                                                                                                                                                                                                                                                                                                                                                                                                                                                                                                                                                                                                                                                                                                                                                                                                                                                                                                                                                                                                                                                                                                                                                                                                                                                                                                                                                                                                                                                                                                                                                                                                                                                                                                                                                                                                                                                                                                                                                                                                                                                                                                                                                        | GTAAACGACGGCCAGTGATTAATTTGGCAAAACCTGATCGGAA               | 0.5                     |  |  |  |
|                |                                 |           |                  | rev                                                                                                                                                                                                                                                                                                                                                                                                                                                                                                                                                                                                                                                                                                                                                                                                                                                                                                                                                                                                                                                                                                                                                                                                                                                                                                                                                                                                                                                                                                                                                                                                                                                                                                                                                                                                                                                                                                                                                                                                                                                                                                                                                                                                                                                                                                                                                                                                                                                                                                                                                                                                                                                                                                                                                                                                                                                                                                                                                                                                                                                                                                                                                                                                                                                                                                                                                                                                                                                                                                                                                                                                                                                                                                                                                                                                                                                                                                                                                                                                                                                                                                                                                                                                                                                                                                                                                                                                                                                                                                                                                                                                                                                                                                                                                                                                                                                                                                                                                                                                                                                                                                                                                                                                                                                                                                        | GGAAACAGCTATGACCATGGAGGCTGTGATGATGAATGGG                  | 1                       |  |  |  |
| 13             | Extraction Control              | 12S rRNA  | ~254             | for                                                                                                                                                                                                                                                                                                                                                                                                                                                                                                                                                                                                                                                                                                                                                                                                                                                                                                                                                                                                                                                                                                                                                                                                                                                                                                                                                                                                                                                                                                                                                                                                                                                                                                                                                                                                                                                                                                                                                                                                                                                                                                                                                                                                                                                                                                                                                                                                                                                                                                                                                                                                                                                                                                                                                                                                                                                                                                                                                                                                                                                                                                                                                                                                                                                                                                                                                                                                                                                                                                                                                                                                                                                                                                                                                                                                                                                                                                                                                                                                                                                                                                                                                                                                                                                                                                                                                                                                                                                                                                                                                                                                                                                                                                                                                                                                                                                                                                                                                                                                                                                                                                                                                                                                                                                                                                        | AAGCGTGATATTGCTCTTTTCGTATAGCGCAACCGGGTCAACGATTT *1        | 2                       |  |  |  |
| 14             | IPC                             | Primer *3 | 119              | for                                                                                                                                                                                                                                                                                                                                                                                                                                                                                                                                                                                                                                                                                                                                                                                                                                                                                                                                                                                                                                                                                                                                                                                                                                                                                                                                                                                                                                                                                                                                                                                                                                                                                                                                                                                                                                                                                                                                                                                                                                                                                                                                                                                                                                                                                                                                                                                                                                                                                                                                                                                                                                                                                                                                                                                                                                                                                                                                                                                                                                                                                                                                                                                                                                                                                                                                                                                                                                                                                                                                                                                                                                                                                                                                                                                                                                                                                                                                                                                                                                                                                                                                                                                                                                                                                                                                                                                                                                                                                                                                                                                                                                                                                                                                                                                                                                                                                                                                                                                                                                                                                                                                                                                                                                                                                                        | GTAAACGACGGCCAGTGAAAGCGTGAATTTGCTCTTCTGATAG               | 1                       |  |  |  |
|                |                                 |           |                  | rev                                                                                                                                                                                                                                                                                                                                                                                                                                                                                                                                                                                                                                                                                                                                                                                                                                                                                                                                                                                                                                                                                                                                                                                                                                                                                                                                                                                                                                                                                                                                                                                                                                                                                                                                                                                                                                                                                                                                                                                                                                                                                                                                                                                                                                                                                                                                                                                                                                                                                                                                                                                                                                                                                                                                                                                                                                                                                                                                                                                                                                                                                                                                                                                                                                                                                                                                                                                                                                                                                                                                                                                                                                                                                                                                                                                                                                                                                                                                                                                                                                                                                                                                                                                                                                                                                                                                                                                                                                                                                                                                                                                                                                                                                                                                                                                                                                                                                                                                                                                                                                                                                                                                                                                                                                                                                                        | GGAAACAGCTATGACCATGACATAGCGCAAGATTAACCACTTATGTTG          | 1                       |  |  |  |
|                |                                 |           |                  | 81 bp oligo:                                                                                                                                                                                                                                                                                                                                                                                                                                                                                                                                                                                                                                                                                                                                                                                                                                                                                                                                                                                                                                                                                                                                                                                                                                                                                                                                                                                                                                                                                                                                                                                                                                                                                                                                                                                                                                                                                                                                                                                                                                                                                                                                                                                                                                                                                                                                                                                                                                                                                                                                                                                                                                                                                                                                                                                                                                                                                                                                                                                                                                                                                                                                                                                                                                                                                                                                                                                                                                                                                                                                                                                                                                                                                                                                                                                                                                                                                                                                                                                                                                                                                                                                                                                                                                                                                                                                                                                                                                                                                                                                                                                                                                                                                                                                                                                                                                                                                                                                                                                                                                                                                                                                                                                                                                                                                               |                                                           |                         |  |  |  |
|                |                                 |           |                  | AAGCGTGATATTGCTCTTTTCGTATAGCGTAAAGCGTGTAAAGCATCACTAAGCATCACTAAGCATCACTAAGCATCACTAAGCATCACTAAGCATCACTAAGCATCACTAAGCATCACTAAGCATCACTAAGCATCACTAAGCATCACTAAGCATCACTAAGCATCACTAAGCATCACTAAGCATCACTAAGCATCACTAAGCATCACTAAGCATCACTAAGCATCACTAAGCATCACTAAGCATCACTAAGCATCACTAAGCATCACTAAGCATCACTAAGCATCACTAAGCATCACTAAGCATCACTAAGCATCACTAAGCATCACTAAGCATCACTAAGCATCACTAAGCATCACTAAGCATCACTAAGCATCACTAAGCATCACTAAGCATCACTAAGCATCACTAAGCATCACTAAGCATCACTAAGCATCACTAAGCATCACTAAGCATCACTAAGCATCACTAAGCATCACTAAGCATCACTAAGCATCACTAAGCATCACTAAGCATCACTAAGCATCACTAAGCATCACTAAGCATCACTAAGCATCACTAAGCATCACTAAGCATCACTAAGCATCACTAAGCATCACTAAGCATCACTAAGCATCACTAAGCATCACTAAGCATCACTAAGCATCACTAAGCATCACTAAGCATCACTAAGCATCACTAAGCATCACTAAGCATCACTAAGCATCACTAAGCATCACTAAGCATCACTAAGCATCACTAAGCATCACTAAGCATCACTAAGCATCACTAAGCATCACTAAGCATCACTAAGCATCACTAAGCATCACTAAGCATCACTAAGCATCACTAAGCATCACTAAGCATCACTAAGCATCACTAAGCATCACTAAGCATCACTAAGCATCACTAAGCATCACTAAGCATCACTAAGCATCACTAAGCATCACTAAGCATCACTAAGCATCACTAAGCATCACTAAGCATCACTAAGCATCACTAAGCATCACTAAGCATCACTAAGCATCACTAAGCATCACTAAGCATCACTAAGCATCACTAAGCATCACTAAGCATCACTAAGCATCACTAAGCATCACTAAGCATCACTAAGCATCACTAAGCATCACTAAGCATCACTAAGCATCACTAAGCATCACTAAGCATCACTAAGCATCACTAAGCATCACTAAGCATCACTAAGCATCACTAAGCATCACTAAGCATCACTAAGCATCACTAAGCATCACTAAGCATCACTAAGCATCACTAAGCATCACTAAGCATCACTAAGCATCACTAAGCATCACTAAGCATCACTAAGCATCACTAAGCATCACTAAGCATCACTAAGCATCACTAAGCATCACTAAGCATCACTAAGCATCACTAAGCATCACTAAGCATCACTAAGCATCACTAAGCATCACTAAGCATCACTAAGCATCACTAAGCATCACTAAGCATCACTAAGCATCACTAAGCATCACTAAGCATCACTAAGCATCACTAAGCATCACTAAGCATCACTAAGCATCACTAAGCATCACTAAGCATCACTAAGCATCACTAAGCATCACTAAGCATCACTAAGCATCACTAAGCATCACTAAGCATCACTAAGCATCACTAAGCATCACTAAGCATCACTAAGCATCACTAAGCATCACTAAGCATCACTAAGCATCACTAAGCATCACTAAGCATCACTAAGCATCACTAAGCATCACTAAGCATCACTAAGCATCACTAAGCATCACTAAGCATCACTAAGCATCACTAAGCATCACTAAGCATCACTAAGCATCACTAAGCATCACTAAGCATCACTAAGCATCACTAAGCATCACTAAGCATCACTAAGCATCACTAAGCATCACTAAGCATCACTAAGCATCACTAAGCATCACTAAGCATCACTAAGCATCACTAAGCATCACTAAGCATCACTAAGCATCACTAAGCATCACTAAGCATCACTAAGCATCACTAAGCATCACTAAGCATCACTAAGCATCACTAAGCATCACTAAGCATCACTAAGCATCACTAAGCATCACTAAGCATCACTAAGCATCACTAAGCATCACTAAGCATCACTAAGCATCACTAAGCATCACTAAGCATCACTAAGCATCACTAAGCATCACTAAGCATCACTAAGCATCACTAAGCATCACTAAGCATCACTAAGCATCACTAAGCATCACTAAGCATCACTAAGCATCACTAAGCATCACTAAGCATCACTAAGCATCACTAAGCATCACTAAGCATCACTAAGCATCACTAAGCATCACTAAGCATCACTAAGCATCACTAAGCATCACTAAGCATCACTAAGCATCACTAAGCATCACTAAGCATCACTAAGCATCACTAAGCATCACTAAGCATCACTAAGCATCACTAAGCATCACTAAGCATCACTAAGCATCACTAAGCATCACTAAGCATCACTAAGCATCACTAAGCATCACTAAGCATCACTAAGCATCACTAAGCATCACTAAGCATCACTAAGCATCACTAAGCATCACTAAGCATCACTAAGCATCACTAAGCATCACTAAGCATCACTAAGCATCACTAAGCATCACTAAGCATCACTAAGCATCACTAAGCATCACTAAGCATCACTAAGCATCACTAAGCATCACTAAGCATCACTAAGCATCACTAAGCATCACTAAGCATCACTAAGCATCACTAAGCATCACTAAGCATCACTAAGCATCACTAAGCATCACTAAGCATCACTAAGCATCACTAAGCATCACTAAGCATCACTAAGCATCACTAAGCATCACTAAGCATCACTAAGCATCACTAAGCATCACTAAGCATCACTAAGCATCACTAAGCATCACTAAGCATCACTAAGCATCACTAAGCATCACTAAGCATCACTAAGCATCACTAAGCATCACTAAGCATCACTAAGCATCACTAAGCATCACTAAGCATCACTAAGCATCACTAAGCATCACTAAGCATCACTAAGCATCACTAAGCATCACTAAGCATCACTAAGCATCACTAAGCATCACTAAGCATCACTAAGCATCACTAAGCATCACTAAGCATCACTAAGCATCACTAAGCATCACTAAGCATCACTAAGCATCACTAAGCATCACTAAGCATCACTAAGCATCACTAAGCATCACTAAGCATCACTAAGCATCACTAAGCATCACTAAGCATCACTAAGCATCACTAAGCATCACTAAGCATCACTAAGCATCACTAAGCATCACTAAGCATCACTAAGCATCACTAAGCATCACTAAGCATCACTAAGCATCACTAAGCATCACTAAGCATCACTAAGCATCACTAAGCATCACTAAGCATCACTAAGCATCACTAAGCATCACTAAGCATCACTAAGCATCACTAAGCATCACTAAGCATCACTAAGCATCACTAAGCATCACTAAGCATCACTAAGCATCACTAAGCATCACTAAGCATCACTAAGCATCACTAAGCATCACTAAGCATCACTAAGCATCACTAAGCATCACTAAGCATCACTAAGCATCACTAAGCATCACTAAGCATCACTAAGCATCACTAAGCATCACTAAGCATCACTAAGCATCACTAAGCATCACTAAGCATCACTAAGCATCACTAAGCATCACTAAGCATCACTAAGCATCACTAAGCATCACTAAGCATCACTAAGCATCACTAAGCATCACTAAGCATCACTAAGCATCACTAAGCATCACTAAGCATCACTAAGCATCACTAAGCATCACTAAGCATCACTAAGCATCACTAAGCATCACTAAGCATCACTAAGCATCACTAAGCATCACTAAGCATCACTAAGCATCACTAAGCATCACTAAGCATCACTAAGCATCACTAAGCATCACTAAGCATCACTAAGCATCACTAAGCATCACTAAGCATCACTAAGCATCACTAAGCATCACTAAGCATCACTAAGCATCACTAAGCATCACTAAGCATCACTAAGCATCACTAAGCATCACTAAGCATCACTAAGCATCACTAAGCATCACTAAGCATCACTAAGCATCACTAAGCATCACTAAGCATCACTAAGCATCACTAAGCATCACTAAGCATCACTAAGCATCACTAAGCATCACTAAGCATCACTAAGCATCACTAAGCATCACTAAGCATCACTAAGCATCACTAAGCATCACTAAGCATCACTAAGCATCACTAAGCATCACTAAGCATCACTAAGCATCACTAAGCATCACTAAGCATCACTAAGCATCACTAAGCATCACTAAGCATCACTAAGCATCACTAAGCATCACTAAGCATCACTAAGCATCACTAAGCATCACTAAGCATCACTAAGCATCACTAAGCATCACTAAGCATCACTAAGCATCACTAAGCATCACTAAGCATCACTAAGCATCACTAAGCATCACTAAGCATCACTAAGCATCACTAAGCATCACTAAGCATCACTAAGCATCACTAAGCATCACTAAGCATCACTAAGCATCACTAAGCATCACTAAGCATCACTAAGCATCACTAAGCATCACTAAGCATCACTAAGCATCACTAAGCATCACTAAGCATCACTAAGCATCACTAAGCATCACTAAGCATCACTAAGCATCACTAAGCATCACTAAGCATCACTAAGCATCACTAAGCATCACTAAGCATCACTAAGCATCACTAAGCATCACTAAGCATCACTAAGCATCACTAAGCATCACTAAGCATCACTAAGCATCACTAAGCATCACTAAGCATCACTAAGCATCACTAAGCATCACTAAGCATCACTAAGCATCACTAAGCATCACTAAGCATCACTAAGCATCACTAAGCATCACTAAGCATCACTAAGCATCACTAAGCATCACTAAGCATCACTAAGCATCACTAAGCATCACTAAGCATCACTAAGCATCACTAAGCATCACTAAGCATCACTAAGCATCACTAAGCATCACTAAGCATCACTAAGCATCACTAAGCATCACTAAGCATCACTAAGCATCACTAAGCATCACTAAGCATCACTAAGCATCACTAAGCATCACTAAGCATCACTAAGCATCACTAAGCATCACTAAGCATCACTAAGCATCACTAAGCATCA |                                                           |                         |  |  |  |

\*1:[1], \*1a: modified from [1]), \*1b: modified from [2] , \*2: modified from [3], \*3:[4].

Tag on *12S rRNA* primer: IPC forward and reverse primer sequence, respectively.

Tag on *cytb* primer: M13 forward and reverse primer sequence, respectively from the TOPO TA cloning kit (Life Technologies).

1. Tobe SS, Linacre AMT. A technique for the quantification of human and non-human mammalian mitochondrial DNA copy number in forensic and other mixtures. *Forensic Sci Int Genet.* 2008 Sep;2(4):249–256.
2. Alonso A, Albarran C, Martin P, Garcia P, Capilla J, Garcia O, et al. Usefulness of microchip electrophoresis for the analysis of mitochondrial DNA in forensic and ancient DNA studies. *Electrophoresis.* 2006 Dec;27(24):5101–5109.
3. Naue J, Lutz-Bonengel S, Sanger T, Schlauderer N, Schmidt U. Modular real-time PCR screening assay for common European animal families. *Int J Legal Med.* 2014 Jan;128(1):11–18.
4. Swango KL, Timken MD, Chong MD, Buoncristiani MR. A quantitative PCR assay for the assessment of DNA degradation in forensic samples. *Forensic Sci Int.* 2006 Apr 20;158(1):14–26.
