# Supplementary material
Source: publisher figshare collection journal article supplement (https://plos.figshare.com/articles/dataset/_/1473846)
Supplement: Supplementary file [file 1]

### GeneSlice 100 Rotor with GeneSlices

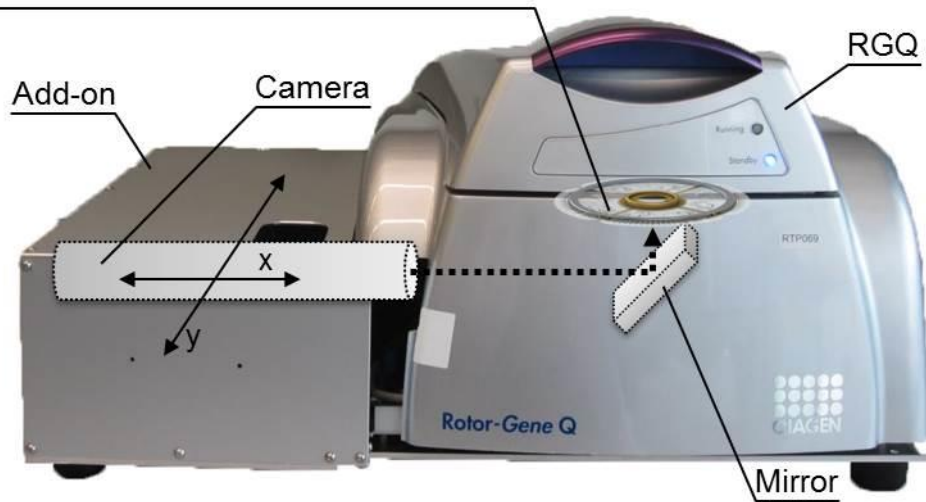

**Figure S1: Strobe RGQ.** The strobe RGQ allows acquisition of stationary images of the rotating *GeneSlices* at arbitrary azimuthal position. It consists of an add-on with a camera, which can be positioned in x- and y-direction. A 45 degree mirror allows observation of the *GeneSlices* from underneath.
