# Supplementary material
Source: publisher figshare collection journal article supplement (https://plos.figshare.com/articles/dataset/_/1473846)
Supplement: Supplementary file [file 1]

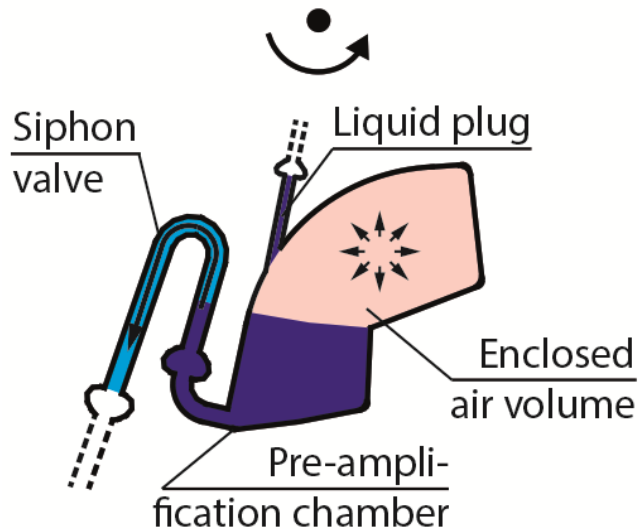

**Figure S3: Explanation for premature valving.** If a liquid plug is unintentionally present in the venting channel, an enclosed air volume (light red) is expanded during temperature increase of the hot start for PCR. As a result, the liquid (dark blue) is displaced through the siphon valve (light blue) during pre-amplification.
